# Supplementary material for: Triglyceride-glucose index in the prediction of new-onset arthritis in the general population aged over 45: the first longitudinal evidence from CHARLS
Source: PubMed Central journal article supplement (PMC10936084; doi:10.1186/s12944-024-02070-8), 2024-03-13
Supplement: 12944_2024_2070_MOESM2_ESM.pdf [file 12944_2024_2070_MOESM2_ESM.pdf]

# Triglyceride\_glucose\_index\_in\_the\_prediction\_of\_new\_onset\_arthritis\_in\_the\_general\_population\_aged\_over\_45\_The\_first\_longitudinal\_evidence\_from\_CHARLS

1 **Triglyceride-glucose index in the prediction of new-onset arthritis in**  
2 **the general population aged over 45: The first longitudinal evidence**  
3 **from CHARLS**

4 **Yang Liu<sup>1</sup>, Junjie Yao<sup>2</sup>, Xiaona Xue<sup>1</sup>, Yanan Lv<sup>3</sup>, Sheng Guo<sup>1</sup>, PeiDong Wei<sup>1</sup>**

5 <sup>1</sup>Dongfang Hospital of Beijing University of Chinese Medicine, No.6 Block. 1 Fangxingyuan, Fengtai  
6 District, Beijing 100078, China

7 <sup>2</sup>Changchun University of Chinese Medicine, Changchun, Jilin 130117, China

8 <sup>3</sup>Dongzhimen Hospital of Beijing University of Chinese Medicine, Dongcheng District, Hai Yun  
9 Cang on the 5th Zip, 100020, China

10

11 **\*Correspondence:**

12 PeiDong Wei

13 66326739@qq.com

14

15

16

17

18

19

20

21

22

23

24

25

26

27

28

29

30

31

32

33

34

35

36

37

38

39

40

41 **Abstract**

42 **Objective**

43 Insulin resistance (IR) imposes a significant burden on inflammatory diseases, and the triglyceride-  
44 glucose (TyG) index, which is an easily accessible indicator for detecting IR, holds great application  
45 potential in predicting the risk of arthritis. The aim of this study is to analyze the association between  
46 the TyG index and the risk of new-onset arthritis in the common population aged over 45 using a  
47 prospective cohort study design.

48 **Method**

49 This population-based cohort study involved 4418 participants from the China Health and Retirement  
50 Longitudinal Study (from Wave 1 to Wave 4). Multivariate logistic regression models were  
51 employed to investigate the association between the TyG index and new-onset arthritis, and RCS  
52 analyses were used to investigate potential non-linear relationships. Moreover, decision trees were  
53 utilized to identify high-risk populations for incident arthritis.

54 **Result**

55 Throughout a 7-year follow-up interval, it was found that 396 participants (8.96%) developed  
56 arthritis. The last TyG index quartile group (Q4) presented the highest risk of arthritis (OR, 1.39;  
57 95% CI, 1.01, 1.91). No dose-response relationship between the TyG index and new-onset arthritis  
58 was identified ( $P_{\text{overall}}=0.068$ ,  $P_{\text{non-linear}}=0.203$ ). In the stratified analysis, we observed BMI ranging  
59 from 18.5 to 24 exhibited a heightened susceptibility to the adverse effects of the TyG index on the  
60 risk of developing arthritis ( $P$  for interaction =0.035).

61 **Conclusion**

62 The TyG index can be used as an independent risk indicator for predicting the start of new-onset  
63 arthritis within individuals aged 45 and above within the general population. Improving glucose and  
64 lipid metabolism, along with insulin resistance, may play a big part in improving the primary  
65 prevention of arthritis.

66  
67 **Keywords:** Arthritis, Triglyceride glucose index, The China Health and Retirement  
68 Longitudinal Study (CHARLS), Insulin resistance, Cohort study.

69  
70  
71  
72  
73  
74  
75  
76  
77  
78  
79  
80  
81  
82

83

## 84 1. Introduction

85 Arthritis, a degenerative inflammatory disease associated with ageing, is defined by two  
86 predominant subtypes: osteoarthritis (OA) and rheumatoid arthritis (RA). These conditions  
87 themselves are causing a burden on health due to demographic shifts towards an older age group [1].  
88 Arthritis not only induces health consequences such as joint damage, pain, and impaired mobility but  
89 also exerts a burden on various physiological systems including the cardiovascular, renal, and  
90 nervous. Severe complications may even escalate mortality rates [2]. Nevertheless, despite the  
91 escalating medical expenses associated with arthritis treatment, there has been no substantial  
92 enhancement in the quality of life for patients who continue to endure pain, disability, and  
93 psychological distress [3, 4].

94 Insulin resistance (IR) has emerged as a significant risk factor for the onset of arthritis,  
95 representing a key component of metabolic syndrome that contributes to disease progression from  
96 multiple perspectives. Specifically, it elicits systemic inflammation and immune dysfunction by  
97 triggering the secretion of pro-inflammatory cytokines like tumour necrosis factor-alpha (TNF $\alpha$ ) and  
98 interleukins (IL) [5, 6]. Therefore, regular assessment of IR may facilitate early detection of arthritis  
99 risk and control disease advancement. The gold standard for assessing insulin resistance (IR) is the  
100 widely acknowledged Hyperinsulinemic euglycemic clamp (HEC) technique. However, due to its  
101 invasive nature, high cost, and time-consuming process, HEC is difficult for subjects to accept, which  
102 makes it impractical for large-scale clinical research [7]. Homeostatic Model Assessment of Insulin  
103 Resistance (HOMA-IR) has gained widespread use in practice for its simplicity and non-invasive  
104 nature. However, its ability to quantify insulin resistance values becomes limited when the pancreatic  
105 beta-cell function is impaired or depleted, making it more suitable for research where IR is a  
106 secondary focus [8]. In 2008, the Triglyceride-Glucose (TyG) index was presented as a  
107 straightforward alternative indicator of IR. It utilizes fasting triglyceride (TG) and glucose  
108 quantitative values obtained from routine biochemical tests to provide a highly sensitive and specific  
109 measure of IR [9]. Moreover, the TyG index partially compensates for the limitations in assessing  
110 pancreatic  $\beta$  cell dysfunction that exists with HOMA-IR [10]. Further research has demonstrated that  
111 the TyG index exhibits superior performance compared to HOMA-IR in forecasting diseases highly  
112 associated with IR such as metabolic syndrome and diabetes [11, 12].

113 Recent cross-sectional studies have indicated an association between a higher TyG index and  
114 an elevated risk of arthritis [13]. However, the design limitations of cross-sectional studies restrict the  
115 ability to infer causality between the two factors. Therefore, this study aims to assess the causal  
116 relationship between the levels of the TyG index and the occurrence of arthritis, using longitudinal  
117 data from the China Health and Retirement Longitudinal Study (CHARLS).

## 118 2. Method

### 119 2.1 Study population

120 The CHARLS project's goal is to assemble a high-quality microdata set from a representative  
121 cohort aged 45 and above, to facilitate interdisciplinary research on population ageing in China. In  
122 2011, a multi-stage probability-proportionality of size sampling method was used to conduct the  
123 CHARLS national baseline survey. The sample included more than 17,000 individuals residing in

124 approximately 10,000 households distributed across 150 counties within 28 provinces. The CHARLS  
125 survey is ongoing, with checkups every 2 to 3 years. Respondents were personally interviewed in  
126 their residences using computer-assisted face-to-face interviews. The survey asked about the  
127 respondent's and his or her household's basic demographics, transfers among household members, the  
128 respondent's health status, health care and insurance, employment, income, expenditures, and assets.  
129 Notably, in both 2011 and 2018, experts collected venous blood samples from individuals who had  
130 observed a fasting period of at least 12 hours without consuming any food or beverages. Adhering to  
131 rigorous standards, all biomedical procedures were executed by accredited professionals. These  
132 specimens, maintained at an optimal 4°C, were promptly dispatched to the Beijing Central  
133 Laboratory (You'anmen Clinical Laboratory Center, Capital Medical University) for advanced  
134 diagnostic assessments. Leveraging enzyme colorimetry, precise measurements were ascertained for  
135 glucose concentrations, TG, low-density lipoprotein cholesterol (LDL-C), and high-density  
136 lipoprotein cholesterol (HDL-C).

137 Figure 1 presents the flowchart detailing the participant selection process. Of the participants  
138 in the 2011 baseline survey, 17,707 individuals completed both the physical examinations and the  
139 questionnaire assessments. Among these participants, participants were subsequently excluded from  
140 the study according to the following specific standards: age below 45 years (423 individuals), history  
141 of lipid-lowering and glucose-lowering medication use (1416 individuals), incomplete TyG data  
142 (5530 individuals), missing arthritis information for both 2011 and 2018 (5250 individuals) and  
143 diagnosis of arthritis at baseline 670 individuals). The history of lipid-lowering and glucose-lowering  
144 medication use was obtained based on self-reporting by the participants. In the CHARLS  
145 questionnaire, the relevant question asked was, "Are you now taking any of the following treatments  
146 to treat [dyslipidemia or diabetes or hyperglycemia] or its complications (Check all that apply)?"  
147 Options included taking Western modern medicine, taking Chinese traditional medicine, or other  
148 treatments.

149 The Ethical Review Board of Peking University initially approved the CHARLS in 2008  
150 (IRB0000105211,015). This study methodology adhered to all pertinent standards and  
151 recommendations set forth by CHARLS. Before participation, each volunteer provided informed  
152 consent by completing a consent form.

## 153 2.2 Assessment of the TyG index

154 The following formula was used to determine the TyG index:  $\ln$  [triglyceride concentration  
155 (mg/dL)  $\times$  fasting blood glucose concentration (mg/dL)/2].

## 156 2.3 Assessment of new-onset arthritis

157 The diagnosis of new-onset arthritis was based on self-reported data. When the interviewer  
158 asked, "Have you been diagnosed with arthritis by a doctor?" and the respondents answered "Yes,"  
159 they were classified as arthritis patients. Subjects who had arthritis in 2011 were excluded, and if the  
160 patient was diagnosed with arthritis after that until the follow-up period in 2018, he or she was  
161 included in the study under our definition of a patient with new-onset arthritis.

## 162 2.4 Assessment of covariates

163 The covariates considered comprised sociodemographic characteristics, lifestyle behaviors,  
164 and current health conditions. Sociodemographic attributes encompassed age (in years), gender

165 (male/female), marital status, educational attainment (Elementary school and below/high school and  
166 college and higher), sleeping duration, and residential area (rural/urban). Lifestyle behaviors  
167 encompassed smoking habits (never smoking/former smoking and current smoking) and drinking  
168 status. Present health issues (yes/no) comprised hypertension and diabetes. Laboratory test results  
169 included triglycerides, glucose, and body mass index (BMI)<sup>19</sup>

170 The diabetes diagnosis follows the<sup>4</sup> criteria set forth by the American Diabetes Association in  
171 2005 [14]. Diabetes was characterized by a fasting blood glucose level of  $\geq 126$  mg/dl (7 mmol/L),  
172 and/or a random blood glucose level of  $\geq 200$  mg/dl<sup>3</sup> (11.1 mmol/L), and/or an HbA1c level of  $\geq$   
173 6.5%, and/or a self-reported confirmation in positive response to the question, "Have you ever been  
174 diagnosed with diabetes or hyperglycemia?". In addition, our classification of BMI follows the  
175 Chinese adult standards [15]. Underweight was characterized by a BMI below 18.5, normal weight  
176 ranged from 18.5 to 23.9, overweight was classified between 24 and 27.9, and obesity was indicated  
177 by a BMI of 28 or higher.

## 178 2.5 Statistical Analysis

179 The data was sourced from the CHARLS survey conducted between 2011 and 2018. Our  
180 investigation<sup>1</sup> encompassed 4,418 participants. For continuous variables, the data were expressed as  
181 either the mean (standard deviation, SD) or median (interquartile range, IQR) and for categorical  
182 variables, as percentages. We employed a multivariable logistic regression model to scrutinize the  
183 relationship between the TyG index and new-onset arthritis. Stratified multivariate regression  
184 analysis was applied for subgroup evaluations. An interaction analysis was conducted to determine  
185 whether sociodemographic and health-related factors moderated the association of the TyG index  
186 with arthritis.

187 Moreover<sup>11</sup> the dose-response relationships between the TyG index and new-onset arthritis  
188 were visualized using restricted cubic splines with 4 knots at the 5th, 35th, 65th, and 95th percentiles.  
189 Finally, we used decision trees to identify high-risk populations for new-onset arthritis. We employed  
190 the Rpart program, integrated within the R environment, for the construction of decision trees. This  
191 facilitated the illustration of classification rules derived via recursive partitioning. In the process of  
192 tree development, we ensured equal misclassification costs for the different categories of the  
193 response variable<sup>36</sup>.

194 Statistical analyses were conducted using R version 4.1, employing the 'ANOVA' function in  
195 the rms package for conducting restricted cubic spline (RCS) analysis, while decision tree models<sup>3</sup>  
196 were generated using the 'Rpart' package. Statistical significance in the analysis was indicated by a  
197 two-tailed P-value below 0.05.

## 198 3. Results

### 199 3.1 Characteristics of the study participants according to the new-onset arthritis and TyG 200 quartiles

201 Table 1 shows the attributes of participants involved in the study. Our finalized cohort  
202 comprised 4,418 participants, with 396 manifesting new-onset arthritis. In comparison to individuals  
203 devoid of arthritis, a greater proportion of women presented with arthritis, accompanied by lesser  
204 educational attainment, a reduced prevalence of hypertension, yet elevated levels of triglyceride and  
205 TyG. About the TyG quartiles, we found that elevated TyG levels significantly correlated with a

206 higher likelihood of female participants, increased prevalence of hypertension, diabetes, elevated  
207 glucose, TG, diminished HDL-C, augmented LDL-C, and enhanced CRP levels (See Table 2).

### 208 **3.2 Relationship between TyG index and new-onset arthritis**

209 Table 3 presents the results obtained from conducting multivariate regression analyses. The  
210 result shows that in comparison to the Q1 group, the incidence rate of arthritis surged by 40% in the  
211 last TyG index quartile group (Q4) within Model 2 (OR, 1.40; 95% CI, 1.03, 1.90) and by 39% in  
212 Model 3 (OR, 1.39; 95% CI, 1.01, 1.91). Figure 2 shows the findings from the Restricted Cubic  
213 Splines (RCS) assessment. It revealed that, within the context of the fully adjusted model, no dose-  
214 response relationship between the TyG index and arthritis was identified ( $P_{overall}=0.068$ ,  $P_{non-}$   
215  $linear=0.203$ ).

### 216 **3.3 Stratified analysis**

217 To assess the stability of the positive association between the TyG index and new-onset  
218 arthritis, participants were categorized into subgroups according to their socio-demographic variables  
219 and disease history, and the association was analyzed within each group (See Figure 3). Further  
220 interaction tests reveal that BMI may play a moderating role in the TyG index's association with new-  
221 onset arthritis ( $P$  for interaction =0.035). Individuals with a BMI ranging from 18.5 to 24 show an  
222 increased risk of developing arthritis associated with higher levels of the TyG index. Specifically, for  
223 individuals with a BMI ranging from 18.5 to 24, the TyG index for each unit increase is associated  
224 with a 64.0% (95% CI: 27.0%-112%) higher odds of arthritis, but there is no association for others.

### 225 **3.4 Decision tree analysis**

226 In Figure 4, the decision tree results for new-onset arthritis are illustrated. The root node of  
227 the model indicates that the incidence of arthritis is influenced by factors such as education level,  
228 TyG index, hypertension, and diabetes. From our analysis, the accuracy result of DT models is  
229 80.42%, and two predominant high-risk subgroups for incident arthritis are identified. The first  
230 subgroup encompasses individuals who have not received a college education or higher, with a TyG  
231 index of 8.1 or greater, and without hypertension. Conversely, the second subgroup consists of those  
232 lacking a college or higher education, possessing a TyG index of 8.1 or above, but presenting with  
233 both hypertension and diabetes.

## 234 **4. Discussion**

235 The focus of cutting-edge research for chronic diseases may have shifted from improving  
236 treatment efficacy to primary prevention of the disease, as once formally diagnosed, it may be  
237 incurable for life. Therefore, from the perspective of preventing the occurrence of arthritis, utilizing  
238 population-based approaches to identify modifiable risk factors presents an 'opportunity window' for  
239 reducing the incidence and alleviating societal burden [17, 18]. Our longitudinal study found that an  
240 elevated TyG index increases the incidence of arthritis in individuals aged 45 and above in the  
241 overall population. Furthermore, the subgroup analysis provides additional supportive evidence for  
242 this conclusion, indicating that individuals within a normal BMI range are significantly affected by  
243 this association. Therefore, our findings not only expand the application scope of the TyG index but  
244 also provide strong evidence for its use as a detection method for arthritis prevention.

245 As a readily available and easily calculated metric, the TyG index has demonstrated its  
246 superiority over other indices such as HOMA-IR in assessing individual insulin resistance levels.

247 Irrespective of diabetic status or insulin treatment, the TyG index consistently exhibits robust  
248 sensitivity and specificity [19]. Currently, the application of this index has progressively expanded to  
249 encompass large-scale clinical investigations on T2DM, cardiovascular disease, pulmonary disorders,  
250 hepatic ailments, and various other medical conditions [20-23]. In the mechanism study of arthritis,  
251 researchers have discovered a strong correlation between IR and the occurrence of arthritis [6, 24].  
252 For instance, there is a strong association between positive serum results for rheumatoid factor, anti-  
253 citrullinated protein antibodies, and IR in cohorts with early inflammatory polyarthritis [25]. In  
254 targeted therapy for RA, symptom improvement is associated with TC/HDL-C, and long-term  
255 follow-up results indicate a more substantial long-term improvement in IR [26]. Moreover, the shift  
256 in understanding the pathogenesis of OA from being solely attributed to joint wear to one caused by  
257 metabolic syndrome-induced systemic low-grade inflammation theory emphasizes the crucial role of  
258 IR in its early onset [27]. Further research has found that the TyG index can serve as a reliable  
259 screening method for IR in individuals diagnosed with immune-inflammatory conditions like RA and  
260 systemic lupus erythematosus [28]. It has been observed that RA patients demonstrate a higher  
261 incidence and severity of IR [29]. The TyG index evaluates IR by considering two closely associated  
262 risk factors: lipid metabolism and glucose metabolism. Impaired glucose metabolism is directly  
263 linked to the occurrence and progression of arthritis, making it a predictive risk factor not only for  
264 individuals with typical arthritic features but also for accelerated development [30]. Consequently,  
265 certain medications targeting arthritis, such as TNF $\alpha$  antagonists and interleukin-1 $\beta$  antagonists,  
266 exhibit potential effects on glucose metabolism by modulating glycolysis and oxidation[6]. These  
267 pharmacological interventions can alleviate abnormal osteoblast differentiation and joint cartilage  
268 damage [31, 32]. Furthermore, a compelling epidemiological association exists between dyslipidemia  
269 and arthritis. A clinical study revealed a positive correlation between the severity of knee  
270 osteoarthritis and elevated levels of triglycerides and total cholesterol [33], suggesting that higher  
271 levels of triglycerides and total cholesterol are associated with increased severity of knee  
272 osteoarthritis. Another retrospective analysis demonstrated significant disparities in lipid metabolism  
273 between newly diagnosed arthritis patients and the control group, with triglycerides exhibiting the  
274 most notable distinction by being 17% higher in those with arthritis compared to those without [33].  
275 However, population-based studies have also indicated that isolated impaired glucose metabolism  
276 and specific lipid abnormalities appear unrelated to the occurrence of arthritis [34-36]. Hence, these  
277 simplistic associations fail to fully elucidate the findings presented in this study.

278 The biological mechanism of the correlation between the TyG index and arthritis risk remains  
279 elusive, it can be elucidated from an IR perspective and its associated mechanisms. Firstly, immune  
280 cell function relies on glucose metabolism, and insulin indirectly regulates immune responses  
281 systemically as well as in cartilage and synovial tissues through its hypoglycemic effects [37]. When  
282 IR develops, elevated blood glucose levels can lead to what is commonly referred to as "glucose  
283 toxicity. This condition induces cellular stress, promotes the production of advanced glycation end  
284 products, generates reactive oxygen species, and triggers the release of inflammatory cytokines [38].  
285 In human chondrocytes, IR reduces autophagic flux while increasing Akt phosphorylation of  
286 autophagy inhibitory factor and synthesis of rpS6 regulatory protein, resulting in impaired  
287 chondrocyte autophagy that hampers removal of damaged intracellular metabolites [39]. In  
288 fibroblast-like synoviocytes (FLS), an experiment confirmed that insulin significantly inhibits matrix



289 metalloproteinase (MMP) 1, MMP13, ADAMTS4 in FLS from non-diabetic individuals exerting a  
290 protective anti-inflammatory effect [40]; however, IR significantly impairs this protective mechanism.  
291 In addition, the PI3K/mTOR/Akt/NF- $\kappa$ B signaling pathway is stimulated by increased insulin levels,  
292 leading to the generation of pro-inflammatory cytokines in FLS, while inhibiting cellular autophagy  
293 [41]. This suggests that high insulin can exacerbate inflammation in synovial cells either  
294 independently or through different signaling pathways. Abnormal glucose metabolism, a related issue  
295 derived from IR, is also associated with the early onset of arthritis. Disruption of the glycolysis and  
296 oxidative phosphorylation equilibrium occurs in the FLS of RA due to an elevation in glycolysis  
297 activity [42]. Experimental evidence suggests that invasive FLS exhibit significantly enhanced  
298 glucose metabolism, thereby contributing to joint damage in the arthritis model. Key enzymes  
299 involved in glycolysis, such as phosphoglycerate kinase, play important roles in promoting an  
300 inflammatory environment within joints and synovial hyperplasia during FLS invasion behavior [43-  
301 45]. Recent studies have shown a strong correlation between the synovial expression of IL-34 and  
302 factors such as rheumatoid factors, erythrocyte sedimentation rate, CRP, and the progression of  
303 arthritis on radiographic imaging [46]. Furthermore, IL-34 has been found to induce arthritis by  
304 promoting glycolysis expansion [47]. The augmented glycolysis induced by IL-34 results in the  
305 emergence of inducible nitric oxide synthase-positive macrophages, thereby enhancing fibroblast and  
306 Th1/Th17 cell polarization capabilities. This interplay between these two cell types amplifies  
307 inflammation and metabolic phenotypes, consequently accelerating arthritis progression through its  
308 impact on cellular energy metabolism, osteoclast formation, and neovascularization. Additionally,  
309 diabetic mice exhibited decreased expression of glucose transporter protein Glut1 along with reduced  
310 glycolytic rates. Moreover, specific induction of Glut4 deficiency further expedites cartilage loss in  
311 OA [48]. Collectively, these findings underscore the significance of improving glucose metabolism  
312 for delaying arthritis development.

313 Abnormal lipid metabolism is another important mechanism of IR, which initially results in  
314 excessive fat accumulation within the body. Adipose tissue, as the main source of inflammatory  
315 factors, chemokines, and metabolically active mediators, has a crucial impact on the development of  
316 arthritis [49]. Leptin and adiponectin, being important adipokines, not only regulate insulin  
317 sensitivity and lipid metabolism but also contribute to the occurrence of arthritis by modulating  
318 inflammatory and immune responses [50]. In the early stages of arthritis, when there is no apparent  
319 inflammation, individuals predisposed to arthritis experience a notable decrease in **mitochondrial  $\beta$ -**  
320 **oxidation of long-chain fatty acids** [51]. This suggests that changes in lipid metabolism occur before  
321 currently identified pathogenic mechanisms and may be the primary driving force behind arthritis. In  
322 the later stages of arthritis, the degree of inflammation in adipose tissue directly affects disease-  
323 related metabolic disturbances. Recent studies have shown a strong correlation between the presence  
324 of RA and the induction of an elevated inflammatory state in adipocytes, which is believed to be  
325 caused by the activation of intracellular kinases, as well as increased expression of IL1 $\beta$  and  
326 mTORC2. In experimental mice, observed changes include low levels of adiponectin and high levels  
327 of leptin, which are commonly associated with IR [52]. Research evidence suggests that lifestyles  
328 and dietary patterns associated with lipid metabolism significantly impact the occurrence and  
329 outcome of arthritis. Diet and exercise can ameliorate disease progression by mitigating inflammation  
330 response, and oxidative stress, and positively influencing gut microbiota [53]. We also observed a

331 pronounced influence of the TyG index on individuals with a normal BMI, aligning with existing  
332 research findings. One study demonstrated a stronger association between non-obese RA patients and  
333 systemic inflammation, disease activity, as well as IR development compared to obese patients [52].  
334 Another study revealed that the RA group had an average HOMA-IR level 31% higher than the  
335 control group. Even more surprising, remarkably within a normal BMI range among RA patients, this  
336 average HOMA-IR level was discovered to be 61% higher compared to the reference range for  
337 healthy individuals [54]. This finding may be attributed to the susceptibility of individuals with a  
338 normal BMI to insulin resistance and dysregulation in glucose and lipid metabolism, underscoring  
339 the significance of maintaining optimal body weight.

#### 340 **4. Study strengths and limitations**

341 Given the distinctive characteristics of CHARLS data, our study offers valuable supplementary  
342 insights from various perspectives [13]. Firstly, employing a prospective cohort study design  
343 strengthens the evidence and allows for partial causal inference regarding the TyG index as an  
344 independent risk factor in predicting incident arthritis. Secondly, our study data fills the gap in the  
345 population aged 45 and above, particularly representing Asian populations with Chinese individuals.  
346 The utilization of the TyG index as a predictor for new-onset arthritis risk presents evident  
347 advantages: it not only entails minimal screening costs but also enhances individual and physician  
348 motivation. Despite potential drawbacks such as overdiagnosis, early-stage disease modulation  
349 exhibits a favorable risk-benefit ratio considering the broad spectrum of disease risks among  
350 individuals with IR.

351 However, to facilitate the acceptance of meaningful supplements in future studies, it is  
352 imperative to provide a comprehensive elucidation of the limitations inherent in this investigation.  
353 Firstly, diet types and medications, such as statins and beta-blockers, significantly influence TG  
354 levels. Regrettably, due to insufficient data availability, we were unable to make targeted adjustments  
355 within our model. Similarly, an exhaustive analysis of specific subtypes of arthritis could not be  
356 conducted owing to the absence of clear classifications for arthritis diagnoses reported by patients  
357 themselves in CHARLS. Consequently, this study underscores the need for additional mechanistic  
358 research to complete the observed associations, providing a deeper understanding of the underlying  
359 processes. In addition, the participants selected for this study were relatively young, and compared to  
360 the general population aged 45 and above, they had a lower prevalence of diabetes or hyperlipidemia.  
361 Additionally, the outcomes of newly developed arthritis were determined based on self-reporting by  
362 individuals. This method may underestimate the actual data. These selection biases and information  
363 biases could potentially affect the representativeness of the study sample. Therefore, any findings  
364 from this study should be interpreted with caution.

#### 365 **5. Conclusions**

366 The TyG index exhibits significant clinical value in predicting the risk of new-onset arthritis  
367 and serves as an independent risk factor that increases the likelihood of developing arthritis among  
368 individuals aged  $\geq 45$  years in China's general population. This study underscores the significance of  
369 enhancing IR and addressing related metabolic abnormalities to prevent and delay the onset of  
370 arthritis, which may be critical for enhancing primary prevention efforts against this condition.

371

# Triglyceride\_glucose\_index\_in\_the\_prediction\_of\_new\_ons...

ORIGINALITY REPORT

8%

SIMILARITY INDEX

PRIMARY SOURCES

- 1 [www.frontiersin.org](http://www.frontiersin.org) Internet 57 words — 1%
- 2 [www.ncbi.nlm.nih.gov](http://www.ncbi.nlm.nih.gov) Internet 44 words — 1%
- 3 [www.mdpi.com](http://www.mdpi.com) Internet 35 words — 1%
- 4 [assets.researchsquare.com](https://assets.researchsquare.com) Internet 30 words — 1%
- 5 Chao Yang, Qinqin Meng, Huaiyu Wang, Yafeng Wang et al. "Anemia and Kidney Function Decline among the Middle-Aged and Elderly in China: A Population-Based National Longitudinal Study", BioMed Research International, 2020 Crossref 19 words — < 1%
- 6 Xin Gong, Yanyan Yu, Qing Tong, Ying Ren, Zhe Jin. "Effects of "Bu Shen Huo Xue Decoction" on the Endometrial Morphology and Expression of Leukaemia Inhibitory Factor in the Rat Uterus during the Oestrous Cycle", Evidence-Based Complementary and Alternative Medicine, 2013 Crossref 18 words — < 1%
- 7 [mdpi-res.com](http://mdpi-res.com) Internet

18 words — < 1%

8 [psj.gau.ac.ir](http://psj.gau.ac.ir)  
Internet

17 words — < 1%

9 Bokun Kim, Keisuke Taniguchi, Tomonori Isobe, Sechang Oh. "Triglyceride-glucose index is capable of identifying metabolically obese, normal-weight older individuals", *Journal of Physiological Anthropology*, 2024  
Crossref

15 words — < 1%

10 [atm.amegroups.com](http://atm.amegroups.com)  
Internet

15 words — < 1%

11 [journals.plos.org](http://journals.plos.org)  
Internet

15 words — < 1%

12 [www.dovepress.com](http://www.dovepress.com)  
Internet

15 words — < 1%

13 [www.science.gov](http://www.science.gov)  
Internet

13 words — < 1%

14 [link.springer.com](http://link.springer.com)  
Internet

12 words — < 1%

15 [journals.sagepub.com](http://journals.sagepub.com)  
Internet

10 words — < 1%

16 [ecerm.org](http://ecerm.org)  
Internet

9 words — < 1%

17 [vdocuments.mx](http://vdocuments.mx)  
Internet

9 words — < 1%

18 [worldwidescience.org](http://worldwidescience.org)  
Internet

9 words — < 1%

---

19 Zayas, Janet P.. "Molecular Dissection of Impaired Infection Control in Diabetic Wound.", Rush University, 2020

ProQuest

6 words — < 1%

---

EXCLUDE QUOTES OFF

EXCLUDE SOURCES OFF

EXCLUDE BIBLIOGRAPHY OFF

EXCLUDE MATCHES OFF
